# Supplementary material for: Phylogenetic Diversity Across the Complete Tree of Life
Source: Research Square preprint supplement (doi:10.21203/rs.3.rs-4397985/v1), 2024-05-20
Supplement: Supplementary file 1 [file 17580a5a8688c0bb055301ab.xlsx]

## Sheet: Sheet1
Clade	Rikki Gumbs, 2020		This paper		Reference
	Total PD (MY)		Total PD (MY)
Turtles	8213		5661.97		Gumbs, Rikki Stephen. 2020. Setting global priorities for the conservation of tetrapod phylogenetic diversity
Amphibs	130703		95735.2
Crocodilians	531		729.6
Lepidosaurs	128218		155705
Mammals	46649		50075.9
Birds	85469		74177.7
Clade	Rikki Gumbs et al., 2020		This paper
	Total threatened ED (MY)	proportion of threatened PD (MY)	Threatened PD (MY)	Threatened PD worse (MY)	Proportion of threatened PD (MY)	Proportion of threatened PD worse (MY)
Turtles	3400	0.41	2191.1	2494.2	0.386985	0.440511
Amphibs	2100	0.16	15289.9	23648.8	0.15971	0.247023
Crocodilians	193	0.37	208	208	0.285088	0.285088
Lepidosaurs	9500	0.08	15293	26759.3	0.098218	0.171859
Mammals	6400	0.09	6941.1	11035.7	0.138612	0.220379
Birds	6200	0.07	5394.3	5755.7	0.0727214	0.0775934
Clade	Scott O, Bates R, Böhm M, et al. Global conservation status of the jawed vertebrate Tree of Life. 2023.			This paper
	Total PD (MY)	Threatened PD (MY)	Proportion of threatened PD (MY)	Total PD (MY)	Threatened PD (MY)	Threatened PD worse (MY)	Proportion of threatened PD (MY)	Proportion of threatened PD worse (MY)
Turtles	6520	1625	0.26	5661.97	2191.1	2494.16	0.386985	0.440511
Amphibs	142670	25000	0.17	95735.2	15289.9	23648.8	0.15971	0.247023
Crocodilians	613	128.73	0.21	729.6	208	208	0.285088	0.285088
Lepidosaurs	134253	20138	0.15	155705	15293	26759.3	0.098218	0.171859
Fish	329935	39000	0.12	348289	17327.6	43069.3	0.0497507	0.12366
Mammals	37068	3706.8	0.1	50075.9	6941.1	11035.7	0.138612	0.220379
Birds	89747	6282.3	0.07	74177.7	5394.3	5755.7	0.0727214	0.0775934
position	Class	Predicted_ED	Observed_mean_ED	Observed_ED_reference	Mean ED estimated in this paper (MY)	Reference_list
1	Aves	7.1	7.6	Jetz et al., 2014	27.6	Betancur­R. R, Broughton RE, Wiley EO, Carpenter K, López JA, Li C, Holcroft NI, Arcila D, Sanciangco M, Cureton II JC, Zhang F, Buser T, Campbell MA, Ballesteros JA, Roa­Varon A,Willis S, Borden WC, Rowley T, Reneau PC, Hough DJ, Lu G, Grande T, Arratia G, Ortí G. The Tree of Life and a New Classification of Bony Fishes. PLOS Currents Tree of Life. 2013 Apr 18. Edition 1. doi: 10.1371/currents…
2	Mammalia	11.6	9.6	Martyn et al., 2012	9.9	Bininda-Emonds, O.R.P, Cardillo, M., Jones, K.E., MacPhee, R.D.E., Beck, R.M.D., Grenyer, R., Price, S.A., Vos, R.A., Gittleman, J.L. & Purvis, A. 2007. The delayed rise of present day mammals. Nature 446, 507-512
3	Crocodilians	17.8			31.7	Blair, J.E. & S.B. Hedges. 2005. Molecular Phylogeny and Divergence Times of Deuterostome Animals. Mol Biol Evol 22:2275-2284. doi:10.1093/molbev/msi225
4	Squamates	15.7	12.6	Tonini et al., 2016	14.3	Chiari, Y, Vincent Cahais, V., Nicolas Galtier, N. and Frédéric Delsuc, F. 2012. Phylogenomic analyses support the position of turtles as the sister group of birds and crocodiles (Archosauria) BMC Biology 201210:65 doi:10.1186/1741-7007-10-65
5	Testudines	17.6			24.2	Erickson , G.M., Gignac, P.M., Steppan, S.J., Lappin, A.K., Vliet, K.A., Brueggen, J.D., Inouye, B.D., Kledzik, D., Grahame J. W. Webb, G.J.W. 2012. Insights into the Ecology and Evolutionary Success of Crocodilians Revealed through Bite-Force and Tooth-Pressure Experimentation PLoS ONE 7: e31781 doi:10.1371/journal.pone.0031781
6	Amphibia	19.4	13.4	Isaac et al., 2012	11	Eschmeyer, W.N., Fricke, R., Fong, J.D., Polack, D.A. 2010. Marine fish diversity: history of knowledge and discovery (Pisces). Zootaxa 2525:19–50
7	Actinopterygii	21.9			10.1	Isaac, NJB, Redding, DW, Meredith, HM, Safi, K. 2012.Phylogenetically-Informed Priorities for Amphibian Conservation PLoS ONE 7: e43912. doi: 10.1371/journal.pone.0043912
8	Chondrichthyes	35.9	30.9	Rikki Gumbs et al., 2018	27.18	Jetz, W.J., Thomas, G.H., Joy, J.B., Redding, D.W., Hartmann, K.H., & A.O. Mooers. 2014. Global distribution and conservation of evolutionary distinctness in birds. Current Biology 24: 1-12. doi: 10.1016/j.cub.2014.03.011
9	Agnatha	68.4			27.6	Martyn, I., Kuhn, T.S., Mooers, A. O., Moulton, V. and A. Spillner. 2012. Computing evolutionary distinctiveness indices in large-scale analysis. Algorithms in Molecular Biology. 7:6. doi: 10.1186/1748-7188-7-6
						Oaks, J.R., 2007. Phylogenetic systematics, biogeography, and evolutionary ecology of the true crocodiles (Eusuchia: Crocodylidae: Crocodylus). MSc. thesis, Univ. of Louisiana
						Pyron, R.A. 2011. A large-scale phylogeny of Amphibia including over 2800 species, and a revised classification of extant frogs, salamanders, and caecilians. Molecular Phylogenetics and Evolution 61:543–583. doi: 10.1016/j.ympev.2011.06.012
						Stein, R.W., Mull, C.G., Kuhn, T.S. et al. Global priorities for conserving the evolutionary history of sharks, rays and chimaeras. Nat Ecol Evol 2, 288–298 (2018).
						Tonini, J.F.R., Beard, K.H., Ferreira, R.B., Jetz, W., Pyron, R.A., 2016. Fully-sampled phylogenies of squamates reveal evolutionary patterns in threat status. Biological Conservation, in press. doi: 10.1016/j.biocon.2016.03.039
